# Supplementary material for: Learning to Order for Inventory Systems with Lost Sales and Uncertain Supplies
Source: Atypon-hosted journal article supplement (doi:10.1287/mnsc.2022.02476), 2024-03-04
Supplement: mnsc.2022.02476.sm1.pdf [file mnsc.2022.02476.sm1.pdf]

## Appendix A: Useful Previous Results

We first state the well-known Hoeffding's inequality, which establishes concentration bound for i.i.d. random variables.

**LEMMA 7 (Hoeffding's Inequality).** *Let  $X_1, \dots, X_m$  be independent random variables such that  $a_i \leq X_i \leq b_i$  almost surely for each  $i \in [m]$ . Then, denote by  $S_n = \sum_{i=1}^m X_i$ . It holds that*

$$P(S_n - \mathbb{E}[S_n] \geq t) \leq \exp\left(-\frac{2t^2}{\sum_{i=1}^m (b_i - a_i)^2}\right)$$

We then state a general concentration bound for Markov chain with stationary distributions from [Healy \(2008\)](#).

**LEMMA 8 (Theorem 1.1 in Healy (2008)).** *Let  $\mathbf{X} = (X_i, i \geq 1)$  be a Markov chain with a stationary distribution  $\phi$ . Suppose that the distribution of  $X_1$  is identical to the distribution of  $\phi$ . Then, there exists a constant  $\lambda > 0$  such that for any  $\epsilon > 0$ , it holds that*

$$P\left(\left|\sum_{i=1}^m X_i - \mathbb{E}\left[\sum_{i=1}^m X_i\right]\right| \geq \sqrt{m} \cdot \epsilon\right) \leq 2 \exp\left(-\frac{\epsilon^2(1-\lambda)}{4}\right) \quad (21)$$

We also state the following lemma regarding the convexity of the pseudo-cost.

**LEMMA 9 (Proposition 1 in Bu et al. (2020)).** *We denote by  $\hat{s}(\mu, Z) = s(q(\mu), z)$  where  $q(\mu) = \min_q \{q : \mathbb{E}[s(q, Z)] \geq \mu\}$ . We also denote the transformed cost function  $TC(\mu) = \hat{C}_\infty^{\pi_{q(\mu)}}$ . Suppose that the random supply function takes one of the four formulations specified in Section 3.2. Then,  $TC(\mu)$  is a convex function over  $[0, \bar{\mu}]$ , where  $\bar{\mu}$  satisfying  $q(\bar{\mu}) = \bar{q}$ .*

We finally state the following result, showing how the limiting inventory level can be bounded.

**LEMMA 10 (Lundberg's Inequality).** *Denote by  $I_\infty$  as the limiting distribution of the stochastic process  $I_{t+1} = (I_t + Q - D)^+$ , where  $Q$  and  $D$  are two positive random variables. Then, there exists a constant  $\rho$  such that for any  $a > 0$ , we have*

$$P(I_\infty \geq a) \leq \exp(-\rho a).$$

Moreover,  $\rho$  is the adjustment coefficient of the random variable  $Q - D$ , which is defined as the solution to  $\lambda(z) = 1$ , where  $\lambda(z) = \mathbb{E}[\exp(z \cdot (Q - D))]$ .

## Appendix B: Missing Proofs

*Proof of Lemma 2.* From Lemma 9, we know that the transformed cost function  $TC(\mu) = \hat{C}_\infty^{\pi_{q(\mu)}}$  is a convex function over  $\mu \in [0, \bar{\mu}]$ , which is a bounded region. Thus, we know that there exists a constant  $\beta' > 0$  such that

$$|TC(\mu_1) - TC(\mu_2)| \leq \beta' \cdot |\mu_1 - \mu_2|, \quad \forall \mu_1, \mu_2 \in [0, \bar{\mu}]. \quad (22)$$

For any  $q_1, q_2 \in [0, \bar{q}]$ , we now denote by  $\mu_1 = \mathbb{E}[s(q_1, Z)]$  and  $\mu_2 = \mathbb{E}[s(q_2, Z)]$ . Moreover, for the random supply function taking one of the four formulations specified in Section 3.2, it is direct to check that there exists a constant  $\alpha' > 0$  such that

$$|\mu_1 - \mu_2| \leq \alpha' \cdot |q_1 - q_2| \quad (23)$$

Plugging (23) into (22), we know that

$$|\hat{C}_\infty^{\pi_{q_1}} - \hat{C}_\infty^{\pi_{q_2}}| = |TC(\mu_1) - TC(\mu_2)| \leq \beta' \cdot |\mu_1 - \mu_2| \leq \alpha' \beta' \cdot |q_1 - q_2|$$

Therefore, we prove that  $\hat{C}_\infty^{\pi_q}$  is Lipschitz continuous over  $q$  with a Lipschitz constant  $\beta = \alpha' \beta'$ .  $\square$

*Proof of Lemma 3.* For each epoch  $n$ , we denote by

$$\mathcal{B}_n = \{I_{\tau_{n'}} \leq \kappa_1 \cdot \log T, \tilde{I}_{\tau_{n'}}^{a^{n*}} \leq \kappa_1 \cdot \log T \text{ and } I_{\tau_{n'} + \kappa_2 \cdot \max\{\log T, 2L\}} = \tilde{I}_{\tau_{n'} + \kappa_2 \cdot \max\{\log T, 2L\}}^{a^{n*}}\}, \forall n' \leq n\}.$$

In order to prove the lemma, it is sufficient to prove that

$$P(\mathcal{B}_n) \geq 1 - \frac{3n}{T^2}. \quad (24)$$

We prove (24) by using induction on the epoch  $n$ .

Clearly, when  $n = 1$ , we have that  $P(I_{\tau_1} = 0) = 1$ . From Lemma 10, there exists a constant  $\kappa_1 > 0$  such that

$$P(\tilde{I}_{\tau_1}^{a^{1*}} \leq \kappa_1 \cdot \log T) \geq 1 - \frac{1}{T^2}$$

by noting that the distribution of  $\tilde{I}_{\tau_1}^{a^{1*}}$  is identical to the distribution of  $I_{\infty}^{a^{1*}}$ .

Now conditioning on the event  $\{\tilde{I}_{\tau_1}^{a^{1*}} \leq \kappa_1 \cdot \log T\}$ , we proceed to bound the probability that event  $\{I_{\tau_1 + \kappa_2 \cdot \max\{\log T, 2L\}} = \tilde{I}_{\tau_1 + \kappa_2 \cdot \max\{\log T, 2L\}}^{a^{1*}}\}$  happens. Note that the evolution of the stochastic process  $I_t$  in (10) is identical to the evolution of the stochastic process  $\tilde{I}_t^{a^{1*}}$  in (13) for  $t = \tau_1, \dots, \tau_2 - 1$ . Therefore, it is clear to see that the event  $\{I_{\tau_1 + \kappa_2 \cdot \max\{\log T, 2L\}} = \tilde{I}_{\tau_1 + \kappa_2 \cdot \max\{\log T, 2L\}}^{a^{1*}}\}$  happens as long as

$$I_t = \tilde{I}_t^{a^{1*}} = 0, \text{ for some } t = \tau_1, \dots, \tau_1 + \kappa_2 \cdot \max\{\log T, 2L\}. \quad (25)$$

We note that  $I_{\tau_1} \leq \tilde{I}_{\tau_1}^{a^{1*}}$  implies that  $I_t \leq \tilde{I}_t^{a^{1*}}$  for all  $t = \tau_1, \dots, \tau_1 + \kappa_2 \cdot \max\{\log T, 2L\}$ . From the non-negativity of  $I_t$  and  $\tilde{I}_t^{a^{1*}}$ , we have that (25) holds as long as  $\tilde{I}_t^{a^{1*}} = 0$  for some  $t = \tau_1, \dots, \tau_1 + \kappa_2 \cdot \max\{\log T, 2L\}$ . As a result, a sufficient condition for (25) to hold is that

$$\sum_{t=\tau_1}^{\tau_1 + \kappa_2 \cdot \max\{\log T, 2L\}} D_t - s(a^{1*}, Z_t) \geq \kappa_1 \cdot \log T$$

Note that  $D_t - s(a^{1*}, Z_t)$  are i.i.d. random variables for  $t = \tau_1, \dots, \tau_1 + \kappa_2 \cdot \max\{\log T, 2L\}$ . We also denote by  $\delta = \mathbb{E}[D] - \mathbb{E}[s(\bar{q}, Z)]$ . Following Hoeffding's inequality (Lemma 7), we have that

$$P\left(\sum_{t=\tau_1}^{\tau_1 + \kappa_2 \cdot \max\{\log T, 2L\}} D_t - s(a^{1*}, Z_t) \geq \kappa_1 \cdot \log T\right) \geq 1 - \exp\left(-\frac{2(\delta \kappa_2 \max\{\log T, 2L\} - \kappa_1 \log T)^2}{\kappa_2 \cdot \max\{\log T, 2L\} \cdot \bar{D}}\right) \geq 1 - \frac{1}{T^2}$$

where  $\kappa_2 \geq \max\{\frac{2\kappa_1}{\delta}, \frac{4\bar{D}}{\delta^2}\} \geq \max\{\frac{2\kappa_1 \log T}{\delta \cdot \max\{\log T, 2L\}}, \frac{4\bar{D} \log T}{\delta^2 \cdot \max\{\log T, 2L\}}\}$ .

The above derivation implies that

$$\begin{aligned} P(\mathcal{B}_1) &= P\left(\mathcal{B}_1 \mid \tilde{I}_{\tau_1}^{a^{1*}} \leq \kappa_1 \cdot \log T\right) \cdot P(\tilde{I}_{\tau_1}^{a^{1*}} \leq \kappa_1 \cdot \log T) \\ &= P\left(\sum_{t=\tau_1}^{\tau_1 + \kappa_2 \cdot \max\{\log T, 2L\}} D_t - s(a^{1*}, Z_t) \geq \kappa_1 \cdot \log T\right) \cdot P(\tilde{I}_{\tau_1}^{a^{1*}} \leq \kappa_1 \cdot \log T) \\ &\geq \left(1 - \frac{1}{T^2}\right) \cdot \left(1 - \frac{1}{T^2}\right) \geq 1 - \frac{2}{T^2} \geq 1 - \frac{3}{T^2} \end{aligned}$$

Therefore, we prove (24) for  $n = 1$ .

Now assume that (24) holds for epoch  $n - 1$ . We consider epoch  $n$ . Clearly, from the definition of the stochastic process  $\tilde{I}_t^{a^{n*}}$  in (13),  $\tilde{I}_t^{a^{n*}}$  refreshes when  $t = \tau_n$ . As a result, the distribution of  $\tilde{I}_{\tau_n}^{a^{n*}}$  is independent of the event  $\mathcal{B}_{n-1}$  and is identical to the distribution of  $I_{\infty}^{a^{n*}}$ , which implies that

$$P(\tilde{I}_{\tau_n}^{a^{n*}} \leq \kappa_1 \cdot \log T \mid \mathcal{B}_{n-1}) = P(\tilde{I}_{\tau_n}^{a^{n*}} \leq \kappa_1 \cdot \log T) \geq 1 - \frac{1}{T^2} \quad (26)$$

where the second inequality follows from Lemma 10. Moreover, conditioning on  $\mathcal{B}_{n-1}$ , since  $I_{\tau_n-1}$  couples with  $\tilde{I}_{\tau_n-1}^{a^{(n-1)*}}$ , we have that

$$P(I_{\tau_n-1} \leq \kappa_1 \cdot \log T \mid \mathcal{B}_{n-1}) = P(\tilde{I}_{\tau_n-1}^{a^{(n-1)*}} \leq \kappa_1 \cdot \log T \mid \mathcal{B}_{n-1}) = P(\tilde{I}_{\tau_n-1}^{a^{(n-1)*}} \leq \kappa_1 \cdot \log T) / P(\mathcal{B}_{n-1}) \quad (27)$$

Note that the distribution of  $\tilde{I}_{\tau_n-1}^{a^{(n-1)*}}$  is identical to the distribution of  $I_\infty^{a^{(n-1)*}}$ , which implies that

$$P(\tilde{I}_{\tau_n-1}^{a^{(n-1)*}} \leq \kappa_1 \cdot \log T) = P(I_\infty^{a^{(n-1)*}} \leq \kappa_1 \cdot \log T) \geq 1 - \frac{1}{T^2}$$

Therefore, by noting that  $P(\mathcal{B}_{n-1}) \leq 1$ , from (27), we have that

$$P(I_{\tau_n-1} \leq \kappa_1 \cdot \log T \mid \mathcal{B}_{n-1}) \geq 1 - \frac{1}{T^2} \quad (28)$$

From (26), (28) and the union bound, we have that

$$P(I_{\tau_n-1} \leq \kappa_1 \cdot \log T \text{ and } \tilde{I}_{\tau_n}^{a^{n*}} \leq \kappa_1 \cdot \log T \mid \mathcal{B}_{n-1}) \geq 1 - \frac{2}{T^2} \quad (29)$$

As a result, conditioning on  $\mathcal{B}_{n-1}$ , we know that

$$I_{\tau_n+L} \leq L \cdot \bar{D} + \kappa_1 \cdot \log T \text{ and } \tilde{I}_{\tau_n+L}^{a^{n*}} \leq L \cdot \bar{D} + \kappa_1 \cdot \log T \quad (30)$$

happens with a probability at least  $1 - \frac{2}{T^2}$ . It is clear to see that the event  $\{I_{\tau_n+\max\{\log T, 2L\}} = \tilde{I}_{\tau_n+\max\{\log T, 2L\}}^{a^{n*}}\}$  happens as long as

$$I_t = \tilde{I}_t^{a^{n*}} = 0 \quad (31)$$

for some  $t = \tau_n + L, \dots, \tau_n + \max\{\log T, 2L\}$ .

Suppose that  $I_{\tau_n} \leq \tilde{I}_{\tau_n}^{a^{n*}}$  (resp.  $I_{\tau_n} \geq \tilde{I}_{\tau_n}^{a^{n*}}$ ), from the evolution of the stochastic process in (10) and (13), we have that  $I_t \leq \tilde{I}_t^{a^{n*}}$  (resp.  $I_t \geq \tilde{I}_t^{a^{n*}}$ ) for any  $t = \tau_n + L, \dots, \tau_n + \max\{\log T, 2L\}$ . Given that  $I_t$  and  $\tilde{I}_t^{a^{n*}}$  must be non-negative (from definition), we conclude that if  $I_{\tau_n} \leq \tilde{I}_{\tau_n}^{a^{n*}}$  (resp.  $I_{\tau_n} \geq \tilde{I}_{\tau_n}^{a^{n*}}$ ), then (31) happens as long as  $\tilde{I}_t^{a^{n*}} = 0$  (resp.  $I_t = 0$ ). Thus, a sufficient condition for (31) to happen is that

$$\sum_{t=\tau_n+L}^{\tau_n+\max\{\log T, 2L\}} D_t - s(a^{n*}, Z_t) \geq L \cdot \bar{D} + \kappa_1 \cdot \log T$$

Since  $D_t - s(a^{n*}, Z_t)$  are i.i.d. random variable for  $t = \tau_n + L, \dots, \tau_n + \max\{\log T, 2L\}$ , we denote by  $\delta_n = \mathbb{E}_{D \sim F}[D] - \mathbb{E}_{Z \sim G}[s(a^{n*}, Z)] \geq \delta$ . Following Hoeffding's inequality (Lemma 7), we have that

$$\begin{aligned} P\left(\sum_{t=\tau_n+L}^{\tau_n+\kappa_2 \max\{\log T, 2L\}} D_t - s(a^{n*}, Z_t) \geq L \cdot \bar{D} + \kappa_1 \cdot \log T\right) &\geq 1 - \exp\left(-\frac{2(\kappa_2 \max\{\log T, 2L\} - L(\bar{D} + 1) - \kappa_1 \log T)^2}{\kappa_2 \max\{\log T, 2L\} - L}\right) \\ &\geq 1 - \frac{1}{T^2} \end{aligned}$$

where  $\kappa_2 \geq \max\{4, 2(\bar{D} + 1 + \kappa_1)\} \geq \max\{\frac{4 \log T}{\max\{\log T, 2L\}}, 2(\bar{D} + 1 + \kappa_1)\}$ . Therefore, we have that

$$P\left(I_{\tau_n+\kappa_2 \max\{\log T, 2L\}} = \tilde{I}_{\tau_n+\kappa_2 \max\{\log T, 2L\}}^{a^{n*}} \mid \mathcal{B}_{n-1} \text{ and (30) happens}\right) \geq 1 - \frac{1}{T^2}.$$

Combining (29) and the induction hypothesis that  $P(\mathcal{B}_{n-1}) \geq 1 - \frac{3(n-1)}{T^2}$ , we have that

$$\begin{aligned} P(\mathcal{B}_n) &= P(\mathcal{B}_{n-1}) \cdot P(I_{\tau_n-1} \leq \kappa_1 \cdot \log T \text{ and } \tilde{I}_{\tau_n}^{a^{n*}} \leq \kappa_1 \cdot \log T \mid \mathcal{B}_{n-1}) \\ &\quad \cdot P\left(I_{\tau_n+\kappa_2 \max\{\log T, 2L\}} = \tilde{I}_{\tau_n+\kappa_2 \max\{\log T, 2L\}}^{a^{n*}} \mid \mathcal{B}_{n-1} \text{ and (30) happens}\right) \\ &\geq \left(1 - \frac{3(n-1)}{T^2}\right) \cdot \left(1 - \frac{2}{T^2}\right) \cdot \left(1 - \frac{1}{T^2}\right) \geq \left(1 - \frac{3(n-1)}{T^2}\right) \cdot \left(1 - \frac{3}{T^2}\right) \\ &\geq 1 - \frac{3n}{T^2} \end{aligned}$$

which completes our proof of the induction of (24) for each epoch  $n$ . Therefore, our proof of the lemma is completed.  $\square$

*Proof of Lemma 4.* Clearly, from (14), it is enough to compare the value of  $I_t$  and  $\tilde{I}_t^{a^{n*}}$  for each epoch  $n$  and each period  $t$  in the epoch  $n$ . Note that we identify an event  $\mathcal{B}$  in Lemma 3 that  $I_t$  and  $\tilde{I}_t^{a^{n*}}$  couple with each other. We consider two situations where  $\mathcal{B}$  happens or  $\mathcal{B}$  not happens.

Case 1: We now assume that  $\mathcal{B}$  happens. Then, we know that for each epoch  $n \in [N]$  and each  $t = \tau_n + \kappa_2 \cdot \max\{\log T, 2L\}, \dots, \tau_{n+1} - 1$ , the value of  $I_t$  and  $\tilde{I}_t^{a^{n*}}$  are identical. Therefore, only when  $t = \tau_n, \dots, \tau_n + \kappa_2 \cdot \max\{\log T, 2L\}$ , the value of  $I_t$  and  $\tilde{I}_t^{a^{n*}}$  can be different. Moreover, note that the evolution of  $I_t$  in (10) is the same as the evolution of  $\tilde{I}_t^{a^{n*}}$  in (13), except that the initial value  $I_{\tau_n}$  is different from  $\tilde{I}_{\tau_n}^{a^{n*}}$ . We know that the gap between  $I_t$  and  $\tilde{I}_t^{a^{n*}}$  can only become smaller. Therefore, we get that

$$|I_t - \tilde{I}_t^{a^{n*}}| \leq |I_{\tau_n} - \tilde{I}_{\tau_n}^{a^{n*}}| \leq \kappa_1 \cdot \log T \quad (32)$$

where the last inequality follows from the condition in the event  $\mathcal{B}$ . We have that

$$\begin{aligned} \left| \mathbb{E} \left[ \sum_n \sum_{t=\tau_n}^{\tau_{n+1}-1} (I_t - \tilde{I}_t^{a^{n*}}) \mid \mathcal{B} \right] \right| &\leq \sum_n \sum_{t=\tau_n}^{\tau_n + \kappa_2 \cdot \max\{\log T, 2L\}} \mathbb{E}[|I_t - \tilde{I}_t^{a^{n*}}| \mid \mathcal{B}] \\ &\leq \sum_n \kappa_1 \cdot \log T \cdot \kappa_2 \cdot \max\{\log T, 2L\} \\ &= N \cdot \kappa_1 \kappa_2 \log T \cdot \max\{\log T, 2L\} \end{aligned} \quad (33)$$

Case 2: We now assume that  $\mathcal{B}$  does not happen. Clearly, a direct upper bound on both  $I_t$  and  $\tilde{I}_t^{a^{n*}}$  is that

$$I_t \leq \bar{D} \cdot t \text{ and } \mathbb{E}[\tilde{I}_t^{a^{n*}} \mid \mathcal{B}^c] \leq \bar{D} \cdot t$$

Therefore, we have that

$$\left| \mathbb{E} \left[ \sum_n \sum_{t=\tau_n}^{\tau_{n+1}-1} (I_t - \tilde{I}_t^{a^{n*}}) \mid \mathcal{B}^c \right] \right| \leq \bar{D} \cdot \sum_{t=1}^T t \leq \bar{D} \cdot T^2 \quad (34)$$

However, from Lemma 3, we know that  $P(\mathcal{B}^c) \leq \frac{3N}{T^2}$ . As a result, combining (33) and (34), we get that

$$\begin{aligned} \left| \mathbb{E} \left[ \sum_n \sum_{t=\tau_n}^{\tau_{n+1}-1} (I_t - \tilde{I}_t^{a^{n*}}) \right] \right| &\leq \left| \mathbb{E} \left[ \sum_n \sum_{t=\tau_n}^{\tau_{n+1}-1} (I_t - \tilde{I}_t^{a^{n*}}) \mid \mathcal{B} \right] \right| \cdot P(\mathcal{B}) + \left| \mathbb{E} \left[ \sum_n \sum_{t=\tau_n}^{\tau_{n+1}-1} (I_t - \tilde{I}_t^{a^{n*}}) \mid \mathcal{B}^c \right] \right| \cdot P(\mathcal{B}^c) \\ &\leq \left| \mathbb{E} \left[ \sum_n \sum_{t=\tau_n}^{\tau_{n+1}-1} (I_t - \tilde{I}_t^{a^{n*}}) \mid \mathcal{B} \right] \right| + \left| \mathbb{E} \left[ \sum_n \sum_{t=\tau_n}^{\tau_{n+1}-1} (I_t - \tilde{I}_t^{a^{n*}}) \mid \mathcal{B}^c \right] \right| \cdot \frac{3N}{T^2} \\ &\leq N \cdot \kappa_1 \kappa_2 \log T \cdot \max\{\log T, 2L\} + 3N\bar{D} \end{aligned}$$

which completes our proof.  $\square$

*Proof of Lemma 5.* The proof generalizes the proof of Lemma 3. For each epoch  $n$ , we denote by

$$\mathcal{C}_n = \{I_{\tau_{n'}}^a \leq \kappa_1 \cdot \log T, \tilde{I}_{\tau_{n'}}^a \leq \kappa_1 \cdot \log T \text{ and } I_{\tau_{n'} + \kappa_2 \cdot \max\{\log T, 2L\}}^a = \tilde{I}_{\tau_{n'} + \kappa_2 \cdot \max\{\log T, 2L\}}^{a^{n'}}, \forall a \in \mathcal{A}_{n'}, \forall n' \leq n\}.$$

In order to prove the lemma, it is sufficient to prove that

$$P(\mathcal{C}_n) \geq 1 - \frac{3(K+1)n}{T^2}. \quad (35)$$

We prove (35) by using induction on the epoch  $n$ .

Clearly, when  $n = 1$ , we have that  $P(I_{\tau_1}^a = 0) = 1$  for all  $a \in \mathcal{A}_1$ . From Lemma 10, there exists a constant  $\kappa_1 > 0$  such that for each  $a \in \mathcal{A}_1$ , it holds that

$$P(\tilde{I}_{\tau_1}^a \leq \kappa_1 \cdot \log T) \geq 1 - \frac{1}{T^2}$$

by noting that the distribution of  $\tilde{I}_{\tau_1}^a$  is identical to the distribution of  $I_\infty^a$  for each  $a \in \mathcal{A}_1$ .

Now conditioning on the event  $\{\tilde{I}_{\tau_1}^a \leq \kappa_1 \cdot \log T, \forall a \in \mathcal{A}_1\}$ , we proceed to bound the probability that event  $\{I_{\tau_1 + \kappa_2 \cdot \max\{\log T, 2L\}}^a = \tilde{I}_{\tau_1 + \kappa_2 \cdot \max\{\log T, 2L\}}^a, \forall a \in \mathcal{A}_1\}$  happens. Note that the evolution of the stochastic process  $I_t^a$  in (9) is identical to the evolution of the stochastic process  $\tilde{I}_t^a$  in (15) for  $t = \tau_1, \dots, \tau_2 - 1$ . Therefore, for each  $a \in \mathcal{A}_1$ , it is clear to see that the event  $\{I_{\tau_1 + \kappa_2 \cdot \max\{\log T, 2L\}}^a = \tilde{I}_{\tau_1 + \kappa_2 \cdot \max\{\log T, 2L\}}^a\}$  happens as long as

$$I_t^a = \tilde{I}_t^a = 0, \quad \text{for some } t = \tau_1, \dots, \tau_1 + \kappa_2 \cdot \max\{\log T, 2L\}. \quad (36)$$

We note that  $I_{\tau_1}^a \leq \tilde{I}_{\tau_1}^a$  implies that  $I_t^a \leq \tilde{I}_t^a$  for all  $t = \tau_1, \dots, \tau_1 + \kappa_2 \cdot \max\{\log T, 2L\}$ . From the non-negativity of  $I_t^a$  and  $\tilde{I}_t^a$ , we have that (36) holds as long as  $\tilde{I}_t^a = 0$  for some  $t = \tau_1, \dots, \tau_1 + \kappa_2 \cdot \max\{\log T, 2L\}$ . As a result, a sufficient condition for (36) to hold for a  $a \in \mathcal{A}_1$  is that

$$\sum_{t=\tau_1}^{\tau_1 + \kappa_2 \cdot \max\{\log T, 2L\}} D_t - s(a, Z_t) \geq \kappa_1 \cdot \log T$$

Note that  $D_t - s(a, Z_t)$  are i.i.d. random variables for  $t = \tau_1, \dots, \tau_1 + \kappa_2 \cdot \max\{\log T, 2L\}$ . We also denote by  $\delta = \mathbb{E}[D] - \mathbb{E}[s(\bar{q}, Z)]$ . Following Hoeffding's inequality (Lemma 7), we have that

$$P\left(\sum_{t=\tau_1}^{\tau_1 + \kappa_2 \cdot \max\{\log T, 2L\}} D_t - s(a, Z_t) \geq \kappa_1 \cdot \log T\right) \geq 1 - \exp\left(-\frac{2(\delta \kappa_2 \max\{\log T, 2L\} - \kappa_1 \log T)^2}{\kappa_2 \cdot \max\{\log T, 2L\} \cdot \bar{D}}\right) \geq 1 - \frac{1}{T^2}$$

where  $\kappa_2 \geq \max\left\{\frac{2\kappa_1}{\delta}, \frac{4\bar{D}}{\delta^2}\right\} \geq \max\left\{\frac{2\kappa_1 \log T}{\delta \cdot \max\{\log T, 2L\}}, \frac{4\bar{D} \log T}{\delta^2 \cdot \max\{\log T, 2L\}}\right\}$ .

The above derivation implies that

$$\begin{aligned} P(\mathcal{B}_1) &= P\left(\mathcal{B}_1 \mid \tilde{I}_{\tau_1}^a \leq \kappa_1 \cdot \log T, \forall a \in \mathcal{A}_1\right) \cdot P(\tilde{I}_{\tau_1}^a \leq \kappa_1 \cdot \log T, \forall a \in \mathcal{A}_1) \\ &= P\left(\sum_{t=\tau_1}^{\tau_1 + \kappa_2 \cdot \max\{\log T, 2L\}} D_t - s(a, Z_t) \geq \kappa_1 \cdot \log T, \forall a \in \mathcal{A}_1\right) \cdot P(\tilde{I}_{\tau_1}^{a^*} \leq \kappa_1 \cdot \log T, \forall a \in \mathcal{A}_1) \\ &\geq \left(1 - \frac{K+1}{T^2}\right) \cdot \left(1 - \frac{K+1}{T^2}\right) \geq 1 - \frac{2(K+1)}{T^2} \geq 1 - \frac{3(K+1)}{T^2} \end{aligned}$$

where the first inequality follows from the union bound by noting that  $|\mathcal{A}_1| \leq K+1$ . Therefore, we prove (35) for  $n=1$ .

Now assume that (35) holds for epoch  $n-1$ . We consider epoch  $n$ . Clearly, from the definition of the stochastic process  $\tilde{I}_t^a$  in (15),  $\tilde{I}_t^a$  refreshes when  $t = \tau_n$ . As a result, the distribution of  $\tilde{I}_{\tau_n}^a$  is independent of the event  $\mathcal{C}_{n-1}$  and is identical to the distribution of  $I_\infty^a$ , which implies that

$$P(\tilde{I}_{\tau_n}^a \leq \kappa_1 \cdot \log T \mid \mathcal{C}_{n-1}) = P(\tilde{I}_{\tau_n}^a \leq \kappa_1 \cdot \log T) \geq 1 - \frac{1}{T^2}, \quad \forall a \in \mathcal{A}_n \quad (37)$$

where the second inequality follows from Lemma 10. Moreover, conditioning on  $\mathcal{B}_{n-1}$ , since  $I_{\tau_n-1}^a$  couples with  $\tilde{I}_{\tau_n-1}^a$  for each  $a \in \mathcal{A}_n \subset \mathcal{A}_{n-1}$ , we have that

$$P(I_{\tau_n-1}^a \leq \kappa_1 \cdot \log T \mid \mathcal{C}_{n-1}) = P(\tilde{I}_{\tau_n-1}^a \leq \kappa_1 \cdot \log T \mid \mathcal{C}_{n-1}) = P(\tilde{I}_{\tau_n-1}^a \leq \kappa_1 \cdot \log T) / P(\mathcal{C}_{n-1}), \quad \forall a \in \mathcal{A}_n \quad (38)$$

Note that the distribution of  $\tilde{I}_{\tau_n-1}^a$  is identical to the distribution of  $I_\infty^a$ , which implies that

$$P(\tilde{I}_{\tau_n-1}^a \leq \kappa_1 \cdot \log T) = P(I_\infty^a \leq \kappa_1 \cdot \log T) \geq 1 - \frac{1}{T^2}, \quad \forall a \in \mathcal{A}_n$$

Therefore, by noting that  $P(\mathcal{C}_{n-1}) \leq 1$ , from (38), we have that

$$P(I_{\tau_n-1}^a \leq \kappa_1 \cdot \log T \mid \mathcal{C}_{n-1}) \geq 1 - \frac{1}{T^2}, \quad \forall a \in \mathcal{A}_n. \quad (39)$$

From (37), (39) and the union bound, we have that

$$P(I_{\tau_n-1} \leq \kappa_1 \cdot \log T \text{ and } \tilde{I}_{\tau_n}^{a^{n*}} \leq \kappa_1 \cdot \log T, \forall a \in \mathcal{A}_n \mid \mathcal{C}_{n-1}) \geq 1 - \frac{2(K+1)}{T^2} \quad (40)$$

where we note that  $|\mathcal{A}_n| \leq K+1$ . As a result, conditioning on  $\mathcal{C}_{n-1}$ , we know that

$$I_{\tau_n+L}^a \leq L \cdot \bar{D} + \kappa_1 \cdot \log T \text{ and } \tilde{I}_{\tau_n+L}^a \leq L \cdot \bar{D} + \kappa_1 \cdot \log T, \quad \forall a \in \mathcal{A}_n \quad (41)$$

happens with a probability at least  $1 - \frac{2(K+1)}{T^2}$ . It is clear to see that for each  $a \in \mathcal{A}_n$ , the event  $\{I_{\tau_n+\max\{\log T, 2L\}}^a = \tilde{I}_{\tau_n+\max\{\log T, 2L\}}^a\}$  happens as long as

$$I_t^a = \tilde{I}_t^a = 0 \quad (42)$$

for some  $t = \tau_n + L, \dots, \tau_n + \max\{\log T, 2L\}$ .

For each  $a \in \mathcal{A}_n$ , suppose that  $I_{\tau_n}^a \leq \tilde{I}_{\tau_n}^a$  (resp.  $I_{\tau_n}^a \geq \tilde{I}_{\tau_n}^a$ ), from the evolution of the stochastic process in (9) and (15), we have that  $I_t^a \leq \tilde{I}_t^a$  (resp.  $I_t^a \geq \tilde{I}_t^a$ ) for any  $t = \tau_n + L, \dots, \tau_n + \max\{\log T, 2L\}$ . Given that  $I_t^a$  and  $\tilde{I}_t^a$  must be non-negative (from definition), we conclude that if  $I_{\tau_n}^a \leq \tilde{I}_{\tau_n}^a$  (resp.  $I_{\tau_n}^a \geq \tilde{I}_{\tau_n}^a$ ), then (31) happens as long as  $\tilde{I}_t^a = 0$  (resp.  $I_t^a = 0$ ). Thus, a sufficient condition for (42) to happen is that

$$\sum_{t=\tau_n+L}^{\tau_n+\max\{\log T, 2L\}} D_t - s(a, Z_t) \geq L \cdot \bar{D} + \kappa_1 \cdot \log T$$

Since  $D_t - s(a, Z_t)$  are i.i.d. random variable for  $t = \tau_n + L, \dots, \tau_n + \max\{\log T, 2L\}$ , we denote by  $\delta_{n,a} = \mathbb{E}_{D \sim F}[D] - \mathbb{E}_{Z \sim G}[s(a, Z)] \geq \delta$ . Following Hoeffding's inequality (Lemma 7), for each  $a \in \mathcal{A}_n$ , we have that

$$P\left(\sum_{t=\tau_n+L}^{\tau_n+\kappa_2 \max\{\log T, 2L\}} D_t - s(a, Z_t) \geq L \cdot \bar{D} + \kappa_1 \cdot \log T\right) \geq 1 - \exp\left(-\frac{2(\kappa_2 \max\{\log T, 2L\} - L(\bar{D} + 1) - \kappa_1 \log T)^2}{\kappa_2 \max\{\log T, 2L\} - L}\right) \geq 1 - \frac{1}{T^2}$$

where  $\kappa_2 \geq \max\{4, 2(\bar{D} + 1 + \kappa_1)\} \geq \max\{\frac{4 \log T}{\max\{\log T, 2L\}}, 2(\bar{D} + 1 + \kappa_1)\}$ . Therefore, from the union bound, we have that

$$P\left(I_{\tau_n+\kappa_2 \max\{\log T, 2L\}}^a = \tilde{I}_{\tau_n+\kappa_2 \max\{\log T, 2L\}}^a, \forall a \in \mathcal{A}_n \mid \mathcal{C}_{n-1} \text{ and (41) happens}\right) \geq 1 - \frac{K+1}{T^2}.$$

Combining (40) and the induction hypothesis that  $P(\mathcal{C}_{n-1}) \geq 1 - \frac{3(K+1)(n-1)}{T^2}$ , we have that

$$\begin{aligned} P(\mathcal{C}_n) &= P(\mathcal{C}_{n-1}) \cdot P(I_{\tau_n-1}^a \leq \kappa_1 \cdot \log T \text{ and } \tilde{I}_{\tau_n}^a \leq \kappa_1 \cdot \log T, \forall a \in \mathcal{A}_n \mid \mathcal{C}_{n-1}) \\ &\quad \cdot P\left(I_{\tau_n+\kappa_2 \max\{\log T, 2L\}}^a = \tilde{I}_{\tau_n+\kappa_2 \max\{\log T, 2L\}}^a, \forall a \in \mathcal{A}_n \mid \mathcal{C}_{n-1} \text{ and (41) happens}\right) \\ &\geq \left(1 - \frac{3(K+1)(n-1)}{T^2}\right) \cdot \left(1 - \frac{2(K+1)}{T^2}\right) \cdot \left(1 - \frac{K+1}{T^2}\right) \\ &\geq \left(1 - \frac{3(K+1)(n-1)}{T^2}\right) \cdot \left(1 - \frac{3(K+1)}{T^2}\right) \\ &\geq 1 - \frac{3(K+1)n}{T^2} \end{aligned}$$

which completes our proof of the induction of (35) for each epoch  $n$ . Therefore, our proof of the lemma is completed.  $\square$

*Proof of Lemma 6.* We first show that for each epoch  $n \in [N]$  and each action  $a \in \mathcal{A}_n$ , we can use the average value of  $\tilde{I}_t^a$  for  $t = \tau_n + \kappa_2 \cdot \max\{\log T, 2L\}$  to  $\tau_{n+1} - 1$  to approximate the value of  $\mathbb{E}[I_\infty^a]$ , where the length of the confidence interval can be given by  $\gamma_n$ .

Clearly,  $\{\tilde{I}_t^a\}_{t=\tau_n+\kappa_2 \cdot \max\{\log T, 2L\}}^{\tau_{n+1}-1}$  forms a Markov chain. We denote by  $\mathbf{I}$  a vector such that

$$\mathbf{I} = (\tilde{I}_t^a, \forall t = \tau_n + \kappa_2 \cdot \max\{\log T, 2L\}, \dots, \tau_{n+1} - 1)$$

We apply Lemma 8 to derive a concentration bound for  $\mathbf{I}$ . To be specific, for each epoch  $n \leq N - 1$ , we regard  $\tilde{I}_{\tau_n+\kappa_2 \cdot \max\{\log T, 2L\}+i}^a$  as  $X_i$  for  $i = 1, \dots, \tau_{n+1} - 1 - \tau_n - \kappa_2 \cdot \max\{\log T, 2L\}$ . Clearly,  $\mathbf{I}$  is a Markov chain with stationary distributions and satisfies the conditions in Lemma 8.

We now denote  $m = \tau_{n+1} - \tau_n - 1 - \kappa_2 \cdot \max\{\log T, 2L\}$ . Then, from Lemma 8, there exists a constant  $\lambda$  such that for any  $\epsilon > 0$ , it holds

$$P \left( \left| \sum_{i=1}^m \tilde{I}_{\tau_n+\kappa_2 \cdot \max\{\log T, 2L\}+i}^a - \mathbb{E} \left[ \sum_{i=1}^m \tilde{I}_{\tau_n+\kappa_2 \cdot \max\{\log T, 2L\}+i}^a \right] \right| \geq \sqrt{m} \cdot \epsilon \right) \leq 2 \exp \left( -\frac{\epsilon^2(1-\lambda)}{4} \right).$$

We now set  $\epsilon = \frac{\gamma_n \sqrt{m}}{2}$ . Then, we have

$$\exp \left( -\frac{\epsilon^2(1-\lambda)}{4} \right) \leq \exp \left( -\frac{(1-\lambda)m\gamma_n^2}{16} \right) \quad (43)$$

We proceed to give a lower bound on  $m\gamma_n^2$ , which will imply an upper bound for (43). Note that

$$m = \tau_{n+1} - \tau_n - 1 - \kappa_2 \cdot \max\{\log T, 2L\} = \kappa_2 \cdot (\max\{\frac{1}{\gamma_n^2} \cdot \log T, 3L\} - \max\{\log T, 2L\})$$

If  $\frac{1}{\gamma_n^2} \cdot \log T \geq 3L$ , then we have

$$\max\{\frac{1}{\gamma_n^2} \cdot \log T, 3L\} - \max\{\log T, 2L\} = \frac{1}{\gamma_n^2} \cdot \log T - \max\{\log T, 2L\} \geq \frac{1}{3\gamma_n^2} \cdot \log T$$

If  $\frac{1}{\gamma_n^2} \cdot \log T < 3L$ , then we have

$$\max\{\frac{1}{\gamma_n^2} \cdot \log T, 3L\} - \max\{\log T, 2L\} = L \geq \frac{1}{3\gamma_n^2} \cdot \log T$$

Therefore, it holds that

$$m = \kappa_2 \cdot (\max\{\frac{1}{\gamma_n^2} \cdot \log T, 3L\} - \max\{\log T, 2L\}) \geq \frac{\kappa_2}{3\gamma_n^2} \cdot \log T \quad (44)$$

Plugging (44) into (43), we have

$$\exp \left( -\frac{\epsilon^2(1-\lambda)}{4} \right) \leq \exp \left( -\frac{(1-\lambda)\kappa_2 \log T}{12} \right) \leq \frac{1}{T^2}$$

where  $\kappa_2 \geq 24/(1-\lambda)$ . We have

$$\begin{aligned} & P \left( \left| \sum_{i=1}^m \tilde{I}_{\tau_n+\kappa_2 \cdot \max\{\log T, 2L\}+i}^a - \mathbb{E} \left[ \sum_{i=1}^m \tilde{I}_{\tau_n+\kappa_2 \cdot \max\{\log T, 2L\}+i}^a \right] \right| \geq m \cdot \frac{\gamma_n}{2} \right) \\ &= P \left( \left| \sum_{i=1}^m \tilde{I}_{\tau_n+\kappa_2 \cdot \max\{\log T, 2L\}+i}^a - m \cdot \mathbb{E}[I_\infty^a] \right| \geq m \cdot \frac{\gamma_n}{2} \right) \\ &\leq \frac{2}{T^2} \end{aligned} \quad (45)$$

where the second inequality follows from the fact that the distribution of  $\tilde{I}_t^a$  is identical to the distribution of  $I_\infty^{\pi_a}$ . Moreover, from Hoeffding's inequality (Lemma 7), it holds that

$$P\left(\left|\sum_{t=\tau_n+\kappa_2}^{\tau_{n+1}-1} s(a, Z_t) - m \cdot \mathbb{E}[s(a, Z)]\right| \geq m \cdot \frac{\gamma_n}{2}\right) \leq 2 \exp\left(-\frac{m\gamma_n^2}{2\bar{D}^2}\right) \leq 2 \exp\left(-\frac{\kappa_2 \log T}{6\bar{D}^2}\right) \leq \frac{2}{T^2} \quad (46)$$

where the second inequality follows from (44) and the third inequality follows from  $\kappa_2 \geq 12\bar{D}^2$ . Therefore, conditional on the event  $\mathcal{C}$  happens, we have that

$$P\left(\left|\tilde{C}_n^a - \hat{C}_\infty^{\pi_a}\right| \leq (h+b) \cdot \frac{\gamma_n}{2} \mid \mathcal{C}\right) \geq 1 - \frac{4}{T^2}$$

which implies that (from union bound over all  $a \in \mathcal{A}$  and all  $n \leq N-1$ )

$$P(\mathcal{E} \mid \mathcal{C}) = P\left(\left\{|\tilde{C}_n^a - \hat{C}_\infty^{\pi_a}| \leq (h+b) \cdot \frac{\gamma_n}{2}, \forall a \in \mathcal{A}_n, \forall 1 \leq n \leq N-1\right\}\right) \geq 1 - \frac{4(K+1)N}{T^2}$$

From Lemma 5, we know that  $P(\mathcal{C}) \geq 1 - \frac{3(K+1)N}{T^2}$ . Therefore, we have that

$$P(\mathcal{E}) = P(\mathcal{E} \mid \mathcal{C}) \cdot P(\mathcal{C}) \geq 1 - \frac{7(K+1)N}{T^2}$$

which completes our proof. □
